# Supplementary material for: Epigenetic reprogramming and aberrant expression of PRAME are associated with increased metastatic risk in Class 1 and Class 2 uveal melanomas
Source: PubMed Central journal article supplement (PMC5312306; doi:10.18632/oncotarget.10962), 2016-07-30
Supplement: oncotarget-07-59209-s001.pdf [file oncotarget-07-59209-s001.pdf]

## Epigenetic reprogramming and aberrant expression of PRAME are associated with increased metastatic risk in Class 1 and Class 2 uveal melanomas

### Supplementary Materials

**Supplementary Table S1: Association of clinical features with PRAME status in 123 uveal melanoma cases from our practice**

| Variable                             | All Classes<br>(n = 123) | Association<br>with<br>PRAME+<br>(P-value) | Class 1<br>(n = 63) | Association<br>with<br>PRAME+<br>(P-value) | Class 2<br>(n = 60) | Association<br>with PRAME+<br>(P-value) |
|--------------------------------------|--------------------------|--------------------------------------------|---------------------|--------------------------------------------|---------------------|-----------------------------------------|
| Age at diagnosis, y                  |                          |                                            |                     |                                            |                     |                                         |
| Mean                                 | 62.4                     | 0.3                                        | 58.0                | 0.1                                        | 67.1                | 0.7                                     |
| Median (Q1–Q3)                       | 64.6 (52.2–74.0)         |                                            | 61.0 (48.2–69.2)    |                                            | 68.7 (61.1–76.0)    |                                         |
| Sex, No.(%)                          |                          |                                            |                     |                                            |                     |                                         |
| Female                               | 67.0 (54.5)              | 0.6                                        | 39.0 (61.9)         | 0.8                                        | 28.0 (46.7)         | 0.8                                     |
| Male                                 | 56.0 (45.5)              |                                            | 24.0 (38.1)         |                                            | 32.0 (53.3)         |                                         |
| Ciliary body involvement, No. (%)    |                          |                                            |                     |                                            |                     |                                         |
| Yes                                  | 58.0 (47.2)              | 0.2                                        | 22.0 (35.5)         | 0.8                                        | 36.0 (60.0)         | 0.06                                    |
| No                                   | 63.0 (51.2)              |                                            | 40.0 (64.5)         |                                            | 23.0 (38.3)         |                                         |
| Not Available                        | 2.0 (1.6)                |                                            | 0.0 (0.0)           |                                            | 1.0 (1.7)           |                                         |
| Extra-ocular extension, No. (%)      |                          |                                            |                     |                                            |                     |                                         |
| Yes                                  | 17.0 (13.8)              | > 0.9                                      | 4.0 (6.4)           | 0.6                                        | 13.0 (21.7)         | > 0.9                                   |
| No                                   | 92.0 (74.8)              |                                            | 54.0 (85.7)         |                                            | 38.0 (63.3)         |                                         |
| Not Available                        | 14.0 (11.4)              |                                            | 5.0 (7.9)           |                                            | 9.0 (15.0)          |                                         |
| LBD, mm                              |                          |                                            |                     |                                            |                     |                                         |
| Mean                                 | 15.5                     | 0.01                                       | 14.7                | 0.03                                       | 16.3                | 0.1                                     |
| Median (Q1–Q3)                       | 16.0 (12.0–19.1)         |                                            | 14.0 (11.0–18.0)    |                                            | 17.0 (14.0–19.8)    |                                         |
| Tumor thickness, mm                  |                          |                                            |                     |                                            |                     |                                         |
| Mean                                 | 9.5                      | 0.02                                       | 8.8                 | 0.7                                        | 10.1                | 0.002                                   |
| Median (Q1–Q3)                       | 10.0 (6.4–12.0)          |                                            | 10.0 (6.9–12.0)     |                                            | 11.0 (8.1–12.7)     |                                         |
| Metastasis, No. (%)                  |                          |                                            |                     |                                            |                     |                                         |
| Yes                                  | 28.0 (22.8)              | NA                                         | 8.0 (12.7)          | NA                                         | 20.0 (33.3)         | NA                                      |
| No                                   | 95.0 (77.2)              |                                            | 55.0 (87.3)         |                                            | 40.0 (66.7)         |                                         |
| Not Available                        | 0.0 (0.0)                |                                            | 0.0 (0.0)           |                                            | 0.0 (0.0)           |                                         |
| Melanoma-specific mortality, No. (%) |                          |                                            |                     |                                            |                     |                                         |
| Yes                                  | 21.0 (17.1)              | NA                                         | 4.0 (6.3)           | NA                                         | 17.0 (28.3)         | NA                                      |
| No                                   | 102.0 (82.9)             |                                            | 59.0 (93.7)         |                                            | 43.0 (71.7)         |                                         |
| Not Available                        | 0.0 (0.0)                |                                            | 0.0 (0.0)           |                                            | 0.0 (0.0)           |                                         |
| All-cause mortality, No (%)          |                          |                                            |                     |                                            |                     |                                         |
| Yes                                  | 23.0 (18.7)              | NA                                         | 5.0 (7.9)           | NA                                         | 18.0 (30.0)         | NA                                      |
| No                                   | 100.0 (81.3)             |                                            | 58.0 (92.1)         |                                            | 42.0 (70.0)         |                                         |
| Not Available                        | 0.0 (0.0)                |                                            | 0.0 (0.0)           |                                            | 0.0 (0.0)           |                                         |
| Time to last follow-up or death, mo  |                          |                                            |                     |                                            |                     |                                         |
| Mean                                 | 29.6                     | NA                                         | 37.3                | NA                                         | 9.2                 | NA                                      |
| Median (Q1–Q3)                       | 21.0 (13.0–33.5)         |                                            | 22.0 (13.5–54.0)    |                                            | 20.0 (10.8–26.1)    |                                         |

NA, not applicable (Kaplan-Meier survival analysis shown in article).

**Supplementary Table S2: Association of clinical features with *PRAME* status in 80 TCGA uveal melanoma cases**

| Variable                                                              | All Classes<br>( <i>n</i> = 80)         | Association<br>with<br>PRAME+<br>( <i>P</i> -value) | Class 1<br>( <i>n</i> = 39)              | Association<br>with<br>PRAME+<br>( <i>P</i> -value) | Class 2<br>( <i>n</i> = 41)             | Association<br>with<br>PRAME+<br>( <i>P</i> -value) |
|-----------------------------------------------------------------------|-----------------------------------------|-----------------------------------------------------|------------------------------------------|-----------------------------------------------------|-----------------------------------------|-----------------------------------------------------|
| Age at diagnosis, y<br>Mean<br>Median (Q1–Q3)                         | 61.7<br>61.5 (51.0–74.3)                | 0.2                                                 | 58.5<br>60.0 (50.5–71.0)                 | 0.04                                                | 64.7<br>64.0 (55.0–76.0)                | > 0.9                                               |
| Sex, No.(%)<br>Female<br>Male                                         | 35.0 (43.8)<br>45.0 (56.2)              | > 0.9                                               | 17.0 (43.6)<br>22.0 (56.4)               | > 0.8                                               | 18.0 (43.9)<br>23.0 (56.1)              | > 0.8                                               |
| Ciliary body<br>involvement, No.<br>(%)<br>Yes<br>No<br>Not Available | 24.0 (30.0)<br>56.0 (70.0)<br>0.0 (0.0) | > 0.9                                               | 8.0 (13.1)<br>31.0 (50.8)<br>22.0 (36.1) | > 0.7                                               | 16.0 (39.0)<br>25.0 (61.0)<br>0.0 (0.0) | > 0.5                                               |
| Extra-ocular<br>extension, No. (%)<br>Yes<br>No<br>Not Available      | 7.0 (8.8)<br>68.0 (85.0)<br>5.0 (6.2)   | 0.4                                                 | 1.0 (2.6)<br>36.0 (92.3)<br>2.0 (5.1)    | > 0.9                                               | 6.0 (14.6)<br>32.0 (78.1)<br>3.0 (7.3)  | > 0.2                                               |
| LBD, mm<br>Mean<br>Median (Q1–Q3)                                     | 16.9<br>17.0 (14.8–19.4)                | 0.02                                                | 16.3<br>16.5 (14.0–18.5)                 | 0.4                                                 | 17.6<br>17.5 (15.5–20.0)                | > 0.03                                              |
| Tumor thickness,<br>mm<br>Mean<br>Median (Q1–Q3)                      | 10.4<br>10.5 (8.5–12.0)                 | 0.2                                                 | 10.0<br>10.0 (6.9–12.0)                  | > 0.9                                               | 10.8<br>11.0 (8.1–12.7)                 | > 0.1                                               |
| Metastasis, No. (%)<br>Yes<br>No<br>Not Available                     | 12.0 (15.0)<br>65.0 (81.2)<br>3.0 (3.8) | NA                                                  | 0.0 (0.0)<br>38.0 (97.4)<br>1.0 (2.6)    | NA                                                  | 12.0 (29.3)<br>27.0 (65.8)<br>2.0 (4.9) | NA                                                  |
| Melanoma-specific<br>mortality, No. (%)<br>Yes<br>No<br>Not Available | 11.0 (13.8)<br>68.0 (85.0)<br>1.0 (1.2) | NA                                                  | 0.0 (0.0)<br>39.0 (62.9)<br>23.0 (37.1)  | NA                                                  | 11.0 (26.8)<br>29.0 (70.7)<br>1.0 (2.5) | NA                                                  |
| All-cause mortality,<br>No (%)<br>Yes<br>No<br>Not Available          | 13.0 (16.2)<br>67.0 (83.8)<br>0.0 (0.0) | NA                                                  | 1.0 (2.6)<br>38.0 (97.4)<br>0.0 (0.0)    | NA                                                  | 12.0 (29.3)<br>29.0 (70.7)<br>0.0 (0.0) | NA                                                  |
| Time to last follow-<br>up or death, mo<br>Mean<br>Median (Q1–Q3)     | 15.0<br>12.9 (2.4–23.4)                 | NA                                                  | 17.4<br>13.3 (2.4–25.3)                  | NA                                                  | 7.8<br>12.8 (2.7–19.7)                  | NA                                                  |

NA, not applicable (Kaplan-Meier survival analysis shown in article).

**Supplementary Table S3: Associations between *PRAME* status and copy number gains and losses in 106 Class 1 and Class 2 uveal melanomas**

| Variable           | All Classes<br>( <i>n</i> = 106) | Association<br>with <i>PRAME</i> +<br>( <i>P</i> -value) | Class 1<br>( <i>n</i> = 51) | Association<br>with <i>PRAME</i> +<br>( <i>P</i> -value) | Class 2<br>( <i>n</i> = 55) | Association<br>with <i>PRAME</i> +<br>( <i>P</i> -value) |
|--------------------|----------------------------------|----------------------------------------------------------|-----------------------------|----------------------------------------------------------|-----------------------------|----------------------------------------------------------|
| 1p loss, No. (%)   |                                  |                                                          |                             |                                                          |                             |                                                          |
| Yes                | 33 (31.1)                        | 0.7                                                      | 11 (21.6)                   | > 0.9                                                    | 22 (40.0)                   | > 0.9                                                    |
| No                 | 73 (68.9)                        |                                                          | 40 (78.4)                   |                                                          | 33 (60.0)                   |                                                          |
| Not Available      | 0 (0.0)                          |                                                          | 0 (0.0)                     |                                                          | 0 (0.0)                     |                                                          |
| 1q gain, No. (%)   |                                  |                                                          |                             |                                                          |                             |                                                          |
| Yes                | 18 (17.0)                        | 0.07                                                     | 11 (21.6)                   | 0.04                                                     | 7 (12.7)                    | > 0.9                                                    |
| No                 | 88 (83.0)                        |                                                          | 40 (78.4)                   |                                                          | 48 (87.3)                   |                                                          |
| Not Available      | 0 (0.0)                          |                                                          | 0 (0.0)                     |                                                          | 0 (0.0)                     |                                                          |
| Chr3 loss, No. (%) |                                  |                                                          |                             |                                                          |                             |                                                          |
| Yes                | 53 (50.0)                        | 0.3                                                      | 0 (0.0)                     | 0.5                                                      | 53 (96.4)                   | 0.5                                                      |
| No                 | 53 (50.0)                        |                                                          | 51 (100.0)                  |                                                          | 2 (3.6)                     |                                                          |
| Not Available      | 0 (0.0)                          |                                                          | 0 (0.0)                     |                                                          | 0 (0.0)                     |                                                          |
| 6p gain, No. (%)   |                                  |                                                          |                             |                                                          |                             |                                                          |
| Yes                | 55 (51.9)                        | 0.1                                                      | 44 (86.3)                   | 0.02                                                     | 11 (20.0)                   | 0.05                                                     |
| No                 | 51 (48.1)                        |                                                          | 7 (13.7)                    |                                                          | 44 (80.0)                   |                                                          |
| Not Available      | 0 (0.0)                          |                                                          | 0 (0.0)                     |                                                          | 0 (0.0)                     |                                                          |
| 6q loss, No. (%)   |                                  |                                                          |                             |                                                          |                             |                                                          |
| Yes                | 32 (30.2)                        | < 0.0001                                                 | 15 (29.4)                   | < 0.0001                                                 | 17 (30.9)                   | < 0.0001                                                 |
| No                 | 74 (69.8)                        |                                                          | 33 (70.6)                   |                                                          | 38 (69.1)                   |                                                          |
| Not Available      | 0 (0.0)                          |                                                          | 0 (0.0)                     |                                                          | 0 (0.0)                     |                                                          |
| 8p loss, No. (%)   |                                  |                                                          |                             |                                                          |                             |                                                          |
| Yes                | 25 (23.6)                        | 0.02                                                     | 3 (5.9)                     | > 0.9                                                    | 22 (40.0)                   | 0.03                                                     |
| No                 | 81 (76.4)                        |                                                          | 48 (94.1)                   |                                                          | 33 (60.0)                   |                                                          |
| Not Available      | 0 (0.0)                          |                                                          | 0 (0.0)                     |                                                          | 0 (0.0)                     |                                                          |
| 8q gain, No. (%)   |                                  |                                                          |                             |                                                          |                             |                                                          |
| Yes                | 80 (75.5)                        | < 0.0001                                                 | 29 (56.9)                   | < 0.0001                                                 | 51 (92.7)                   | 0.07                                                     |
| No                 | 26 (24.5)                        |                                                          | 22 (43.1)                   |                                                          | 4 (7.3)                     |                                                          |
| Not Available      | 0 (0.0)                          |                                                          | 0 (0.0)                     |                                                          | 0 (0.0)                     |                                                          |
| 16q loss, No. (%)  |                                  |                                                          |                             |                                                          |                             |                                                          |
| Yes                | 24 (22.6)                        | < 0.0001                                                 | 6 (11.8)                    | 0.004                                                    | 18 (32.7)                   | 0.01                                                     |
| No                 | 82 (77.4)                        |                                                          | 45 (88.2)                   |                                                          | 37 (67.3)                   |                                                          |
| Not Available      | 0 (0.0)                          |                                                          | 0 (0.0)                     |                                                          | 0 (0.0)                     |                                                          |

**Supplementary Table S4: Associations between *PRAME* status and common driver mutations in 139 Class 1 and Class 2 uveal melanomas**

| Variable         | All Classes<br>( <i>n</i> = 139) | Association<br>with <i>PRAME</i> +<br>( <i>P</i> -value) | Class 1<br>( <i>n</i> = 63) | Association<br>with <i>PRAME</i> +<br>( <i>P</i> -value) | Class 2<br>( <i>n</i> = 60) | Association<br>with <i>PRAME</i> +<br>( <i>P</i> -value) |
|------------------|----------------------------------|----------------------------------------------------------|-----------------------------|----------------------------------------------------------|-----------------------------|----------------------------------------------------------|
| BAP1, No. (%)    |                                  |                                                          |                             |                                                          |                             |                                                          |
| Yes              | 60 (43.2)                        | 0.02                                                     | 1 (1.6)                     | 0.5                                                      | 59 (77.6)                   | 0.2                                                      |
| No               | 64 (46.0)                        |                                                          | 54 (85.7)                   |                                                          | 10 (13.2)                   |                                                          |
| Not Available    | 15 (10.8)                        |                                                          | 8 (12.7)                    |                                                          | 7 (9.2)                     |                                                          |
| SF3B1, No. (%)   |                                  |                                                          |                             |                                                          |                             |                                                          |
| Yes              | 28 (20.1)                        | 0.05                                                     | 21 (33.3)                   | < 0.0001                                                 | 7 (9.2)                     | 0.4                                                      |
| No               | 88 (63.3)                        |                                                          | 35 (55.6)                   |                                                          | 53 (69.7)                   |                                                          |
| Not Available    | 23 (16.6)                        |                                                          | 7 (11.1)                    |                                                          | 16 (21.1)                   |                                                          |
| EIF1AX, No. (%)  |                                  |                                                          |                             |                                                          |                             |                                                          |
| Yes              | 16 (11.5)                        | 0.02                                                     | 14 (22.2)                   | 0.004                                                    | 2 (2.6)                     | 0.5                                                      |
| No               | 90 (64.8)                        |                                                          | 38 (60.3)                   |                                                          | 52 (68.4)                   |                                                          |
| Not Available    | 33 (23.7)                        |                                                          | 11 (17.5)                   |                                                          | 22 (29.0)                   |                                                          |
| GNAQ, No. (%)    |                                  |                                                          |                             |                                                          |                             |                                                          |
| Yes              | 67 (48.2)                        | 0.5                                                      | 38 (60.3)                   | 0.6                                                      | 29 (28.7)                   | 0.3                                                      |
| No               | 64 (46.0)                        |                                                          | 24 (38.1)                   |                                                          | 40 (52.6)                   |                                                          |
| Not Available    | 8 (5.8)                          |                                                          | 1 (1.6)                     |                                                          | 7 (9.2)                     |                                                          |
| GNA11, No. (%)   |                                  |                                                          |                             |                                                          |                             |                                                          |
| Yes              | 55 (39.6)                        | > 0.9                                                    | 20 (31.7)                   | > 0.9                                                    | 35 (46.1)                   | > 0.9                                                    |
| No               | 74 (53.2)                        |                                                          | 41 (65.1)                   |                                                          | 33 (43.4)                   |                                                          |
| Not Available    | 10 (7.2)                         |                                                          | 2 (3.2)                     |                                                          | 8 (10.5)                    |                                                          |
| CYSLTR2, No. (%) |                                  |                                                          |                             |                                                          |                             |                                                          |
| Yes              | 3 (2.2)                          | NA                                                       | 1 (1.6)                     | NA                                                       | 2 (2.6)                     | NA                                                       |
| No               | 77 (55.4)                        |                                                          | 38 (60.3)                   |                                                          | 39 (51.3)                   |                                                          |
| Not Available    | 59 (42.4)                        |                                                          | 24 (38.1)                   |                                                          | 35 (46.1)                   |                                                          |
| PLCB4, No. (%)   |                                  |                                                          |                             |                                                          |                             |                                                          |
| Yes              | 2 (1.4)                          | NA                                                       | 0 (0.0)                     | NA                                                       | 2 (3.3)                     | NA                                                       |
| No               | 78 (56.1)                        |                                                          | 39 (61.9)                   |                                                          | 23 (38.3)                   |                                                          |
| Not Available    | 59 (42.4)                        |                                                          | 24 (38.1)                   |                                                          | 35 (58.4)                   |                                                          |

NA, not applicable (insufficient number of cases for statistical analysis).

**Supplementary Table S5: Validation of differential methylation at 5 CpG sites within the *PRAME* promoter region in *PRAME*<sup>+</sup> versus *PRAME*<sup>-</sup> tumors**

Genomic location on chromosome 22

|                           |      | 22901898 | 22901907 | 22902166 | 22902216 | 22902255 |
|---------------------------|------|----------|----------|----------|----------|----------|
| PRAME <sup>+</sup> tumors | MM10 | X        | X        |          | X        | X        |
|                           | MM92 |          |          | X        | X        |          |
|                           | MM89 |          |          |          |          | X        |
|                           | MM16 |          |          |          |          |          |
| PRAME <sup>-</sup> tumors | MM28 |          |          |          |          |          |
|                           | MM49 |          |          |          |          |          |
|                           | MM50 |          |          |          |          |          |

X, indicates hypomethylation of indicated nucleotide.

**Supplementary Table S6: Sources and numbers of uveal melanoma samples for the various data analyses**

| Variable                     | Our Practice | Castle | TCGA      |
|------------------------------|--------------|--------|-----------|
| Number of samples            | 123          | 555    | 80        |
| Class 1/Class 2 data         | Yes          | Yes    | Estimated |
| Class 1A/1B data             | Yes          | Yes    | No        |
| Clinical annotations         | Yes          | No     | Yes       |
| Whole-exome data             | 24           | No     | 80        |
| Mutation data                | 59           | No     | 80        |
| Chromosomal copy number data | 26           | No     | 80        |

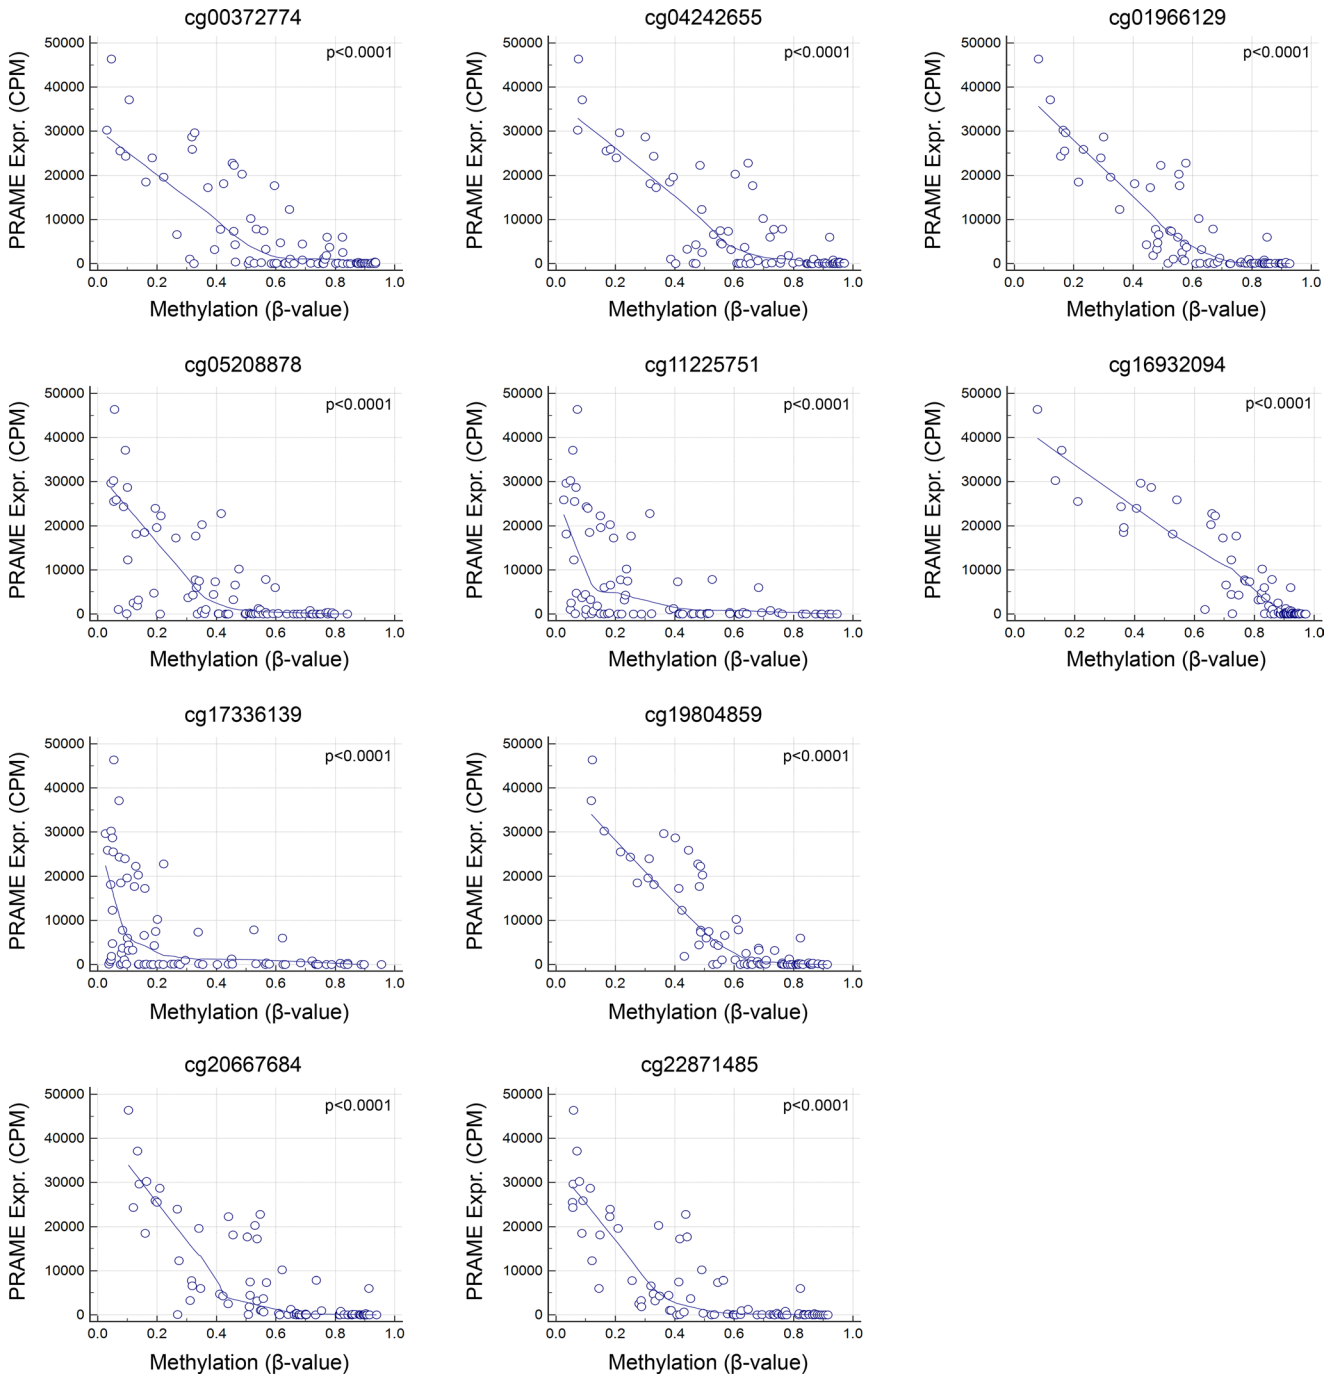

**Supplementary Figure S1: Association between PRAME mRNA expression and promoter hypomethylation.** Scatter plots showing the relationship between PRAME mRNA expression levels (obtained from the TCGA RNA-Seq data) and PRAME promoter methylation (obtained from the TCGA Infinium Human Methylation 450 Bead Chip Array data) at ten additional methylation sites represented by the indicated probes. Spearman's rank correlation coefficient was used to determine  $P$ -values.
